# Supplementary material for: Cobalt nanoparticles encapsulated in carbon nanotube-grafted nitrogen and sulfur co-doped multichannel carbon fibers as efficient bifunctional oxygen electrocatalysts
Source: Royal Society of Chemistry journal article supplement (doi:10.1039/c6ta10291c), 2017-01-01
Supplement: c6ta10291c1.pdf [file c6ta10291c1.pdf]

## Supporting Information

### Cobalt nanoparticles encapsulated in carbon nanotube-grafted nitrogen and sulfur co-doped multichannel carbon fibers as efficient bifunctional oxygen electrocatalysts

Zhe Wang,<sup>a,b</sup> Shengjie Peng,<sup>\*b,c</sup> Yuxiang Hu,<sup>d</sup> Linlin Li,<sup>c,e</sup> Tao Yan,<sup>a</sup> Guorui Yang,<sup>b</sup> Dongxiao Ji,<sup>b</sup> Srinivasan Madhavi,<sup>e</sup> Zhijuan Pan,<sup>\*a</sup> and Seeram Ramakrishna<sup>b</sup>

**Table S1** Detail preparation information of different samples.

| Sample                     | Precursor solution                                   | Stabilization         | Carbonization                                      | Further (second) pyrolysis                                    |
|----------------------------|------------------------------------------------------|-----------------------|----------------------------------------------------|---------------------------------------------------------------|
| <b>MCF-900</b>             | PAN, and PS in DMF                                   | 280 °C for 2 h in air | 700 °C for 3 h under H <sub>2</sub> /Ar atmosphere | 900 °C for 2 h under N <sub>2</sub> atmosphere                |
| <b>NS/MCF-900</b>          | PAN, PS, and TAA in DMF                              | 280 °C for 2 h in air | 700 °C for 3 h under H <sub>2</sub> /Ar atmosphere | 900 °C for 2 h under N <sub>2</sub> atmosphere                |
| <b>Co@NS/MCF-900</b>       | PAN, PS, TAA, and cobalt(III) acetylacetonate in DMF | 280 °C for 2 h in air | 700 °C for 3 h under H <sub>2</sub> /Ar atmosphere | 900 °C for 2 h under N <sub>2</sub> atmosphere                |
| <b>Co@NS/CNTs-MCF-700</b>  | PAN, PS, TAA, and cobalt(III) acetylacetonate in DMF | 280 °C for 2 h in air | 700 °C for 3 h under H <sub>2</sub> /Ar atmosphere | With melamine 700 °C for 2 h under N <sub>2</sub> atmosphere  |
| <b>Co@NS/CNTs-MCF-800</b>  | PAN, PS, TAA, and cobalt(III) acetylacetonate in DMF | 280 °C for 2 h in air | 700 °C for 3 h under H <sub>2</sub> /Ar atmosphere | With melamine 800 °C for 2 h under N <sub>2</sub> atmosphere  |
| <b>Co@NS/CNTs-MCF-900</b>  | PAN, PS, TAA, and cobalt(III) acetylacetonate in DMF | 280 °C for 2 h in air | 700 °C for 3 h under H <sub>2</sub> /Ar atmosphere | With melamine 900 °C for 2 h under N <sub>2</sub> atmosphere  |
| <b>Co@NS/CNTs-MCF-1000</b> | PAN, PS, TAA, and cobalt(III) acetylacetonate in DMF | 280 °C for 2 h in air | 700 °C for 3 h under H <sub>2</sub> /Ar atmosphere | With melamine 1000 °C for 2 h under N <sub>2</sub> atmosphere |

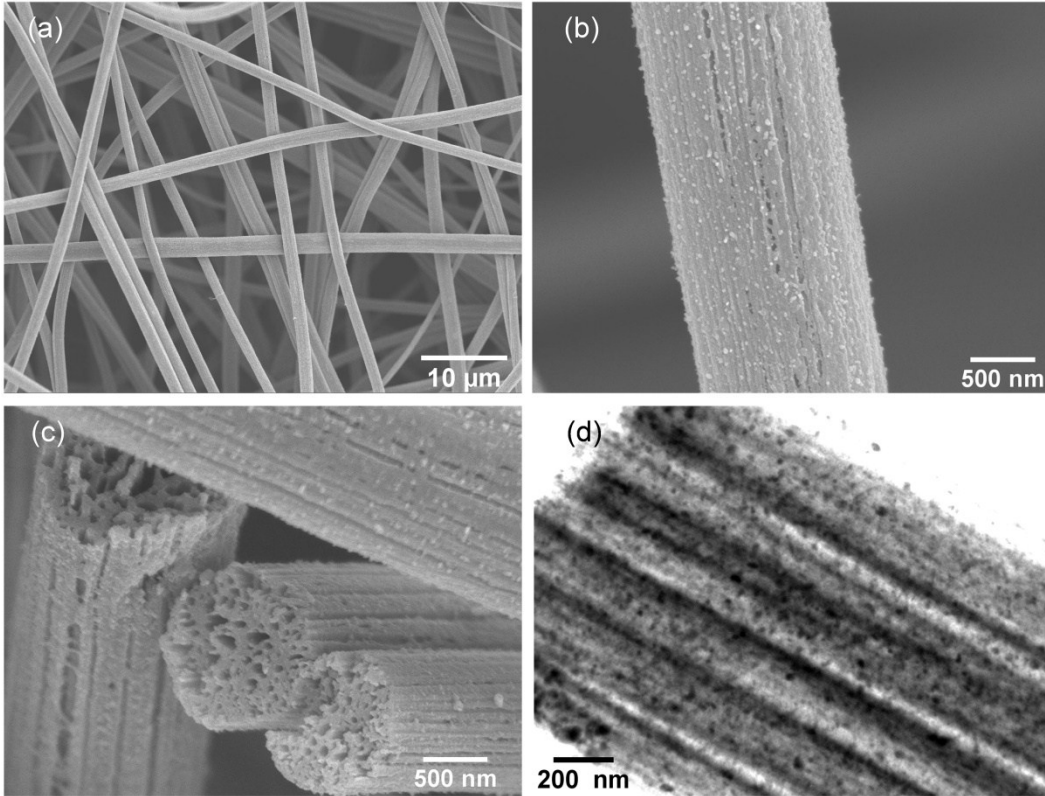

**Fig. S1** Morphology and structural characterization of Co@NS/MCF obtained at 700 °C in H<sub>2</sub>/Ar atmosphere for 3 h. a, b) SEM images; c) the corresponding cross-sectional image and d) the TEM image.

The SEM and TEM images show the multichannel structure of Co@NS/MCF with the Co NPs uniformly dispersed.

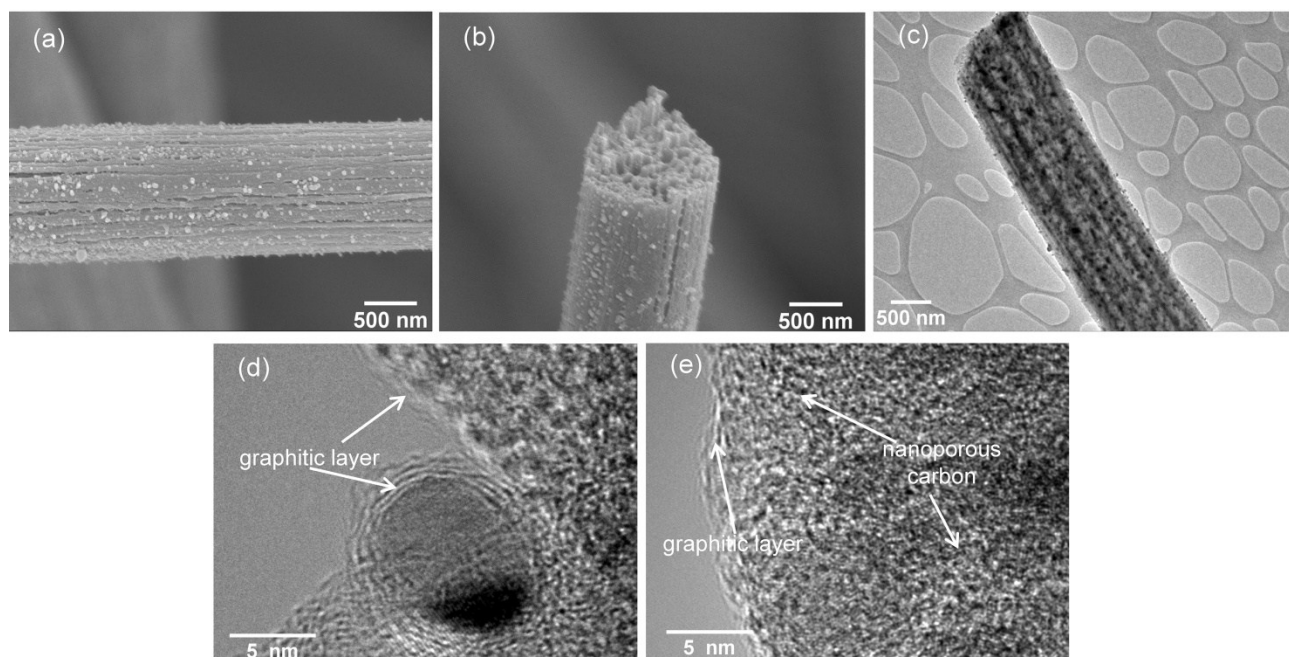

**Fig. S2** a, b) SEM images of Co@NS/MCF-900 carbon fiber; c) the corresponding TEM image; d, e) HRTEM images of Co NPs and carbon nanostructure on Co@NSMCF-900, respectively.

Fig. S2a, b, and c show the multichannel structure of Co@NS/MCF-900 with the Co NPs uniformly dispersed. Fig. S2d reveals that Co NP was coated by few graphitic carbon layers. Fig. S2e shows the multichannel fiber is of highly porous with few graphitic layers.

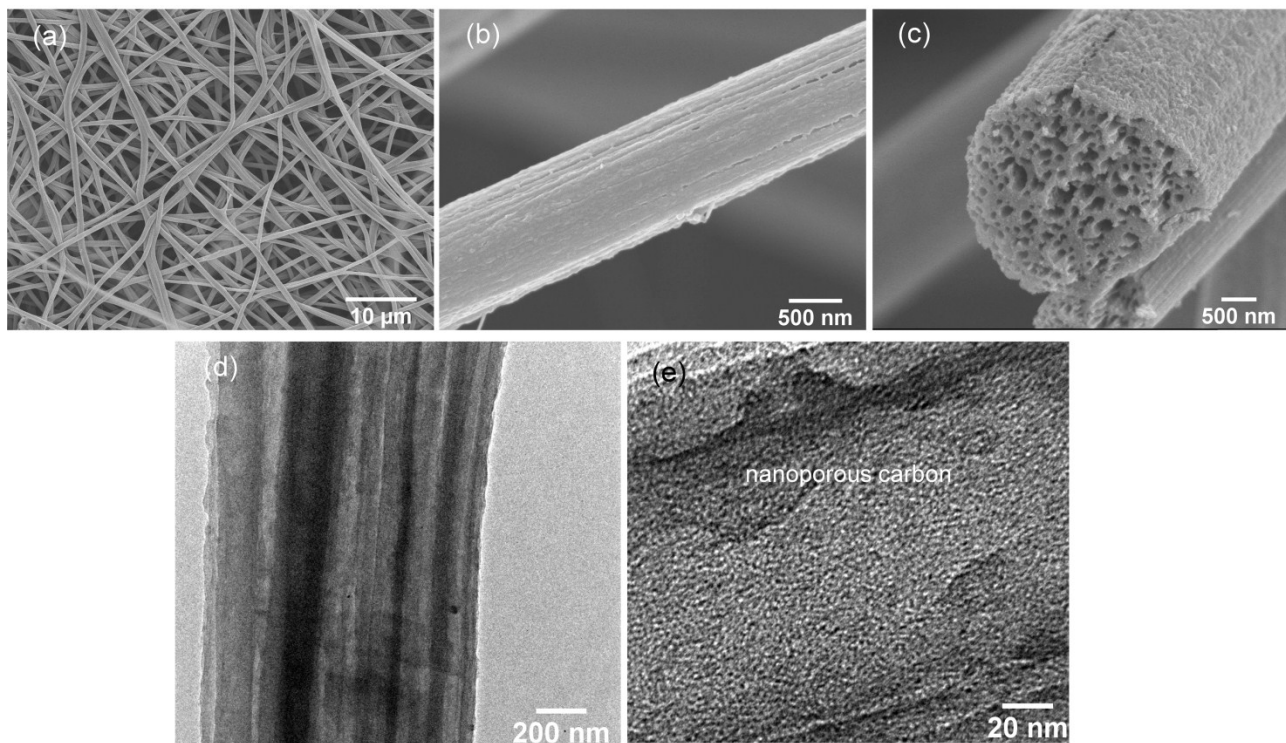

**Fig. S3** a, b, and c ) SEM images of NS/MCF-900 carbon fiber; d) the corresponding TEM image; e) HRTEM image of carbon nanostructure on NS/MCF-900

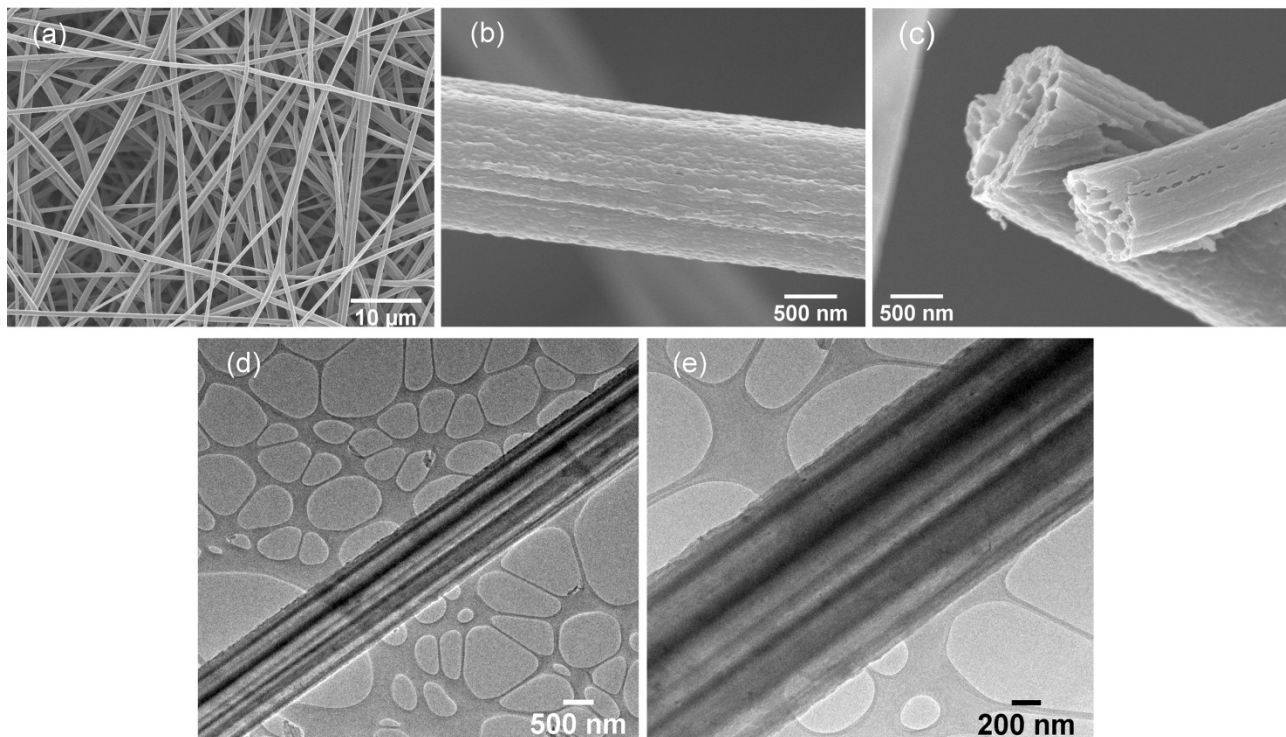

**Fig. S4** a, b, and c ) SEM images of MCF-900 carbon fiber; d, e) the corresponding TEM images.

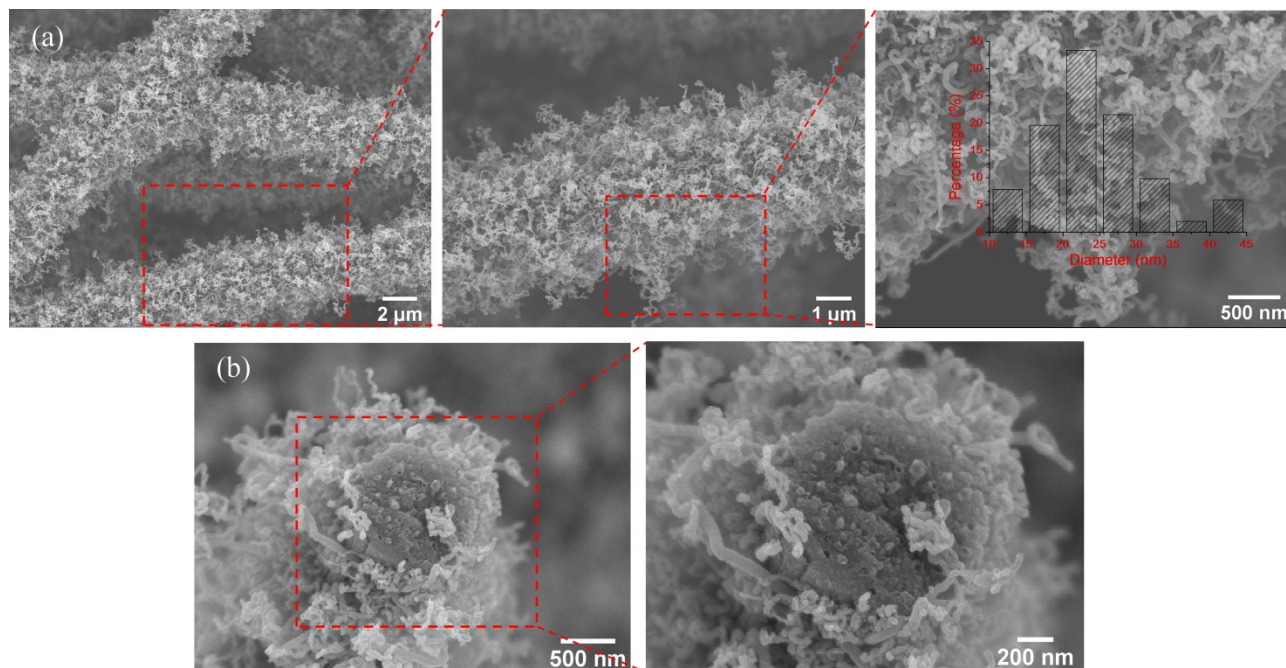

**Fig. S5** a) SEM images of Co@NS/CNTs-MCF-900, and the inset shows the diameter distribution of CNTs; b) the corresponding cross-sectional image.

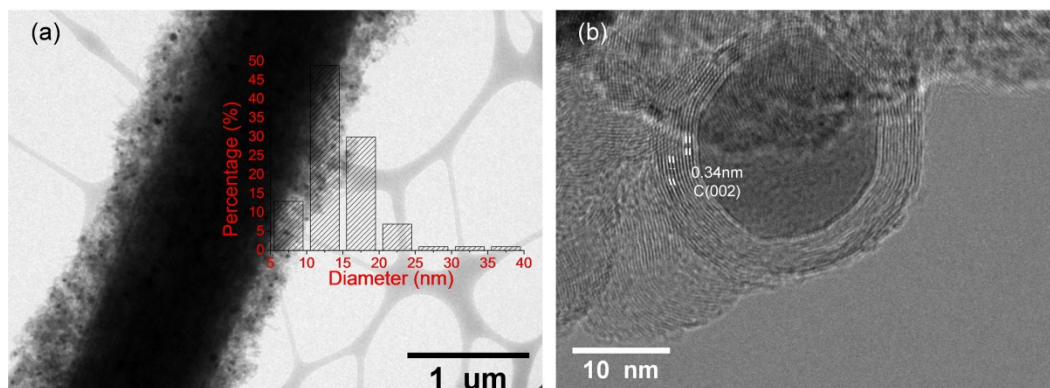

**Fig. S6** a) TEM image of Co@NS/CNTs-MCF-900 carbon fiber, and the inset shows the diameter distribution of Co NPs; b) HRTEM of Co NPs coated by several graphitic layers.

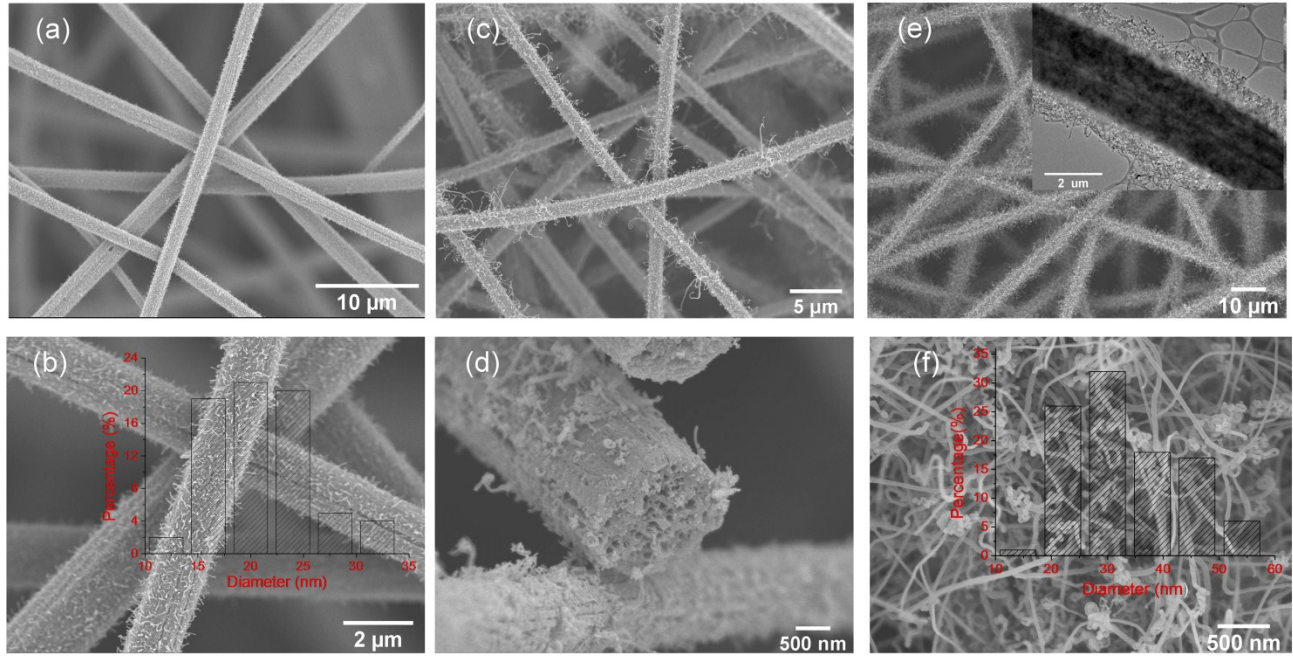

**Fig. S7** a,b) SEM images of Co@NS/CNTs-MCF-700 carbon fibers and the inset shows the diameter distribution of CNTs; c) SEM image of Co@NS/CNTs-MCF-800 carbon fibers and d) the corresponding cross-sectional image; e) SEM image of Co@NS/CNTs-MCF-1000 carbon fibers, and the inset shows the corresponding TEM image; f) SEM of CNTs grafted on Co@NS/CNTs-MCF-1000 and the inset shows the diameter distribution of CNTs.

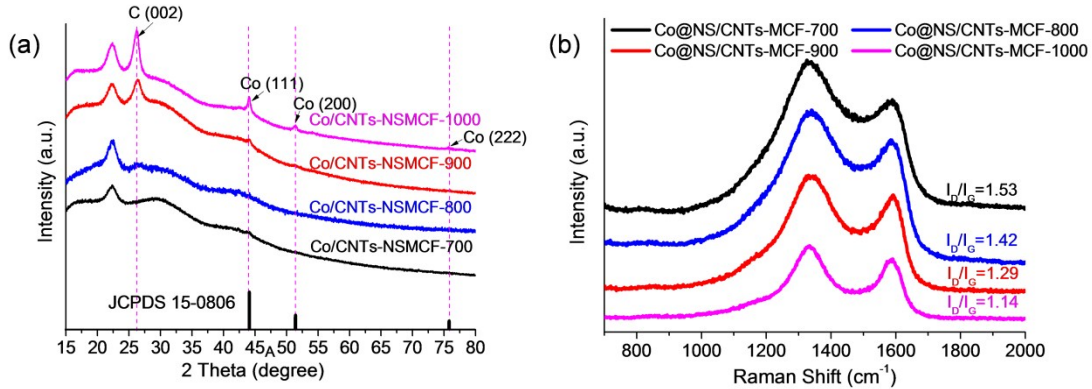

**Fig. S8** a) XRD patterns and b) Raman spectra of Co@NS/CNTs-MCF-700, Co@NS/CNTs-MCF-800, Co@NS/CNTs-MCF-900, and Co@NS/CNTs-MCF-1000, respectively

**Table S2** Atomic contents of Co@NS/CNTs-MCF-700, Co@NS/CNTs-MCF-800, Co@NS/CNTs-MCF-900, and Co@NS/CNTs-MCF-1000, calculated from the XPS survey spectra

| Sample                     | C (at. %) | Co (at. %) | N (at. %) | S (at. %) | O (at. %) |
|----------------------------|-----------|------------|-----------|-----------|-----------|
| <b>Co@NS/CNTs-MCF-700</b>  | 84.29     | 2.05       | 9.29      | 0.40      | 3.97      |
| <b>Co@NS/CNTs-MCF-800</b>  | 87.44     | 1.53       | 8.41      | 0.28      | 2.35      |
| <b>Co@NS/CNTs-MCF-900</b>  | 91.68     | 0.60       | 6.54      | 0.12      | 1.06      |
| <b>Co@NS/CNTs-MCF-1000</b> | 94.49     | 0.32       | 2.87      | 0         | 0.49      |

**Table S3** Cobalt content in Co@NS/CNTs-MCF-700, Co@NS/CNTs-MCF-800, Co@NS/CNTs-MCF-900, and Co@NS/CNTs-MCF-1000, determined by ICP-AES

| Sample           | Co@NS/CNTs-MCF-700 | Co@NS/CNTs-MCF-800 | Co@NS/CNTs-MCF-900 | Co@NS/CNTs-MCF-1000 |
|------------------|--------------------|--------------------|--------------------|---------------------|
| <b>Co (wt %)</b> | 10.21              | 7.23               | 3.57               | 2.46                |

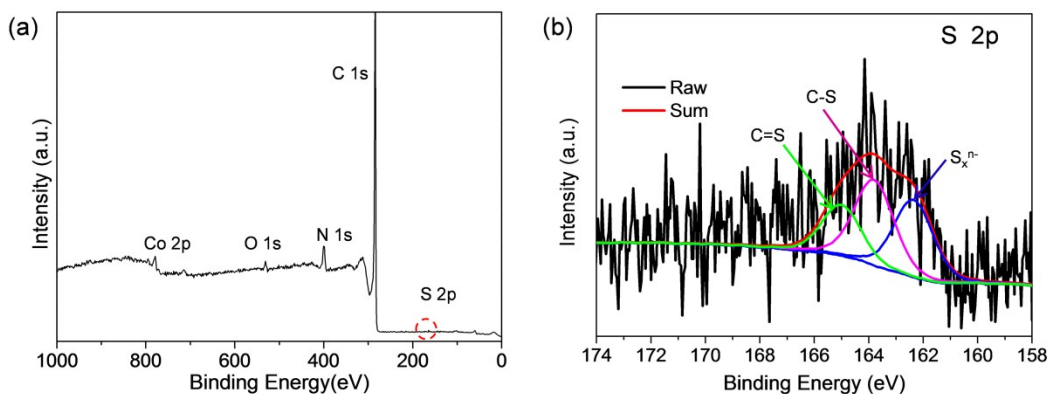

**Fig. S9** a) XPS survey scan of Co@NS/CNTs-MCF-900; b) high-resolution and the corresponding deconvoluted S 2p spectra of Co@NS/CNTs-MCF-900.



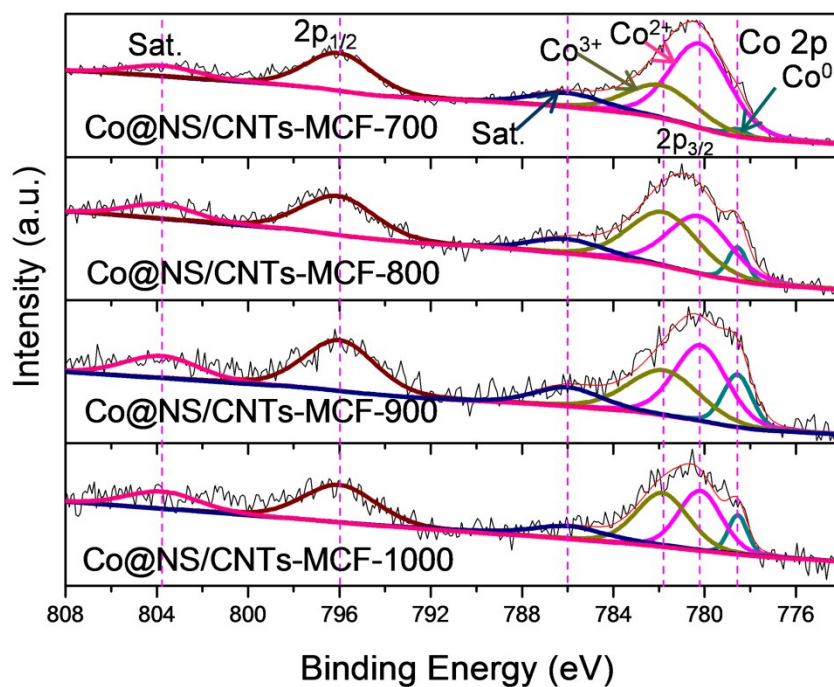

**Fig. S10** High-resolution and the corresponding deconvoluted Co 2p XPS spectrum of Co@NS/CNTs-MCF-700, Co@NS/CNTs-MCF-800, Co@NS/CNTs-MCF-900, and Co@NS/CNTs-MCF-1000, respectively.

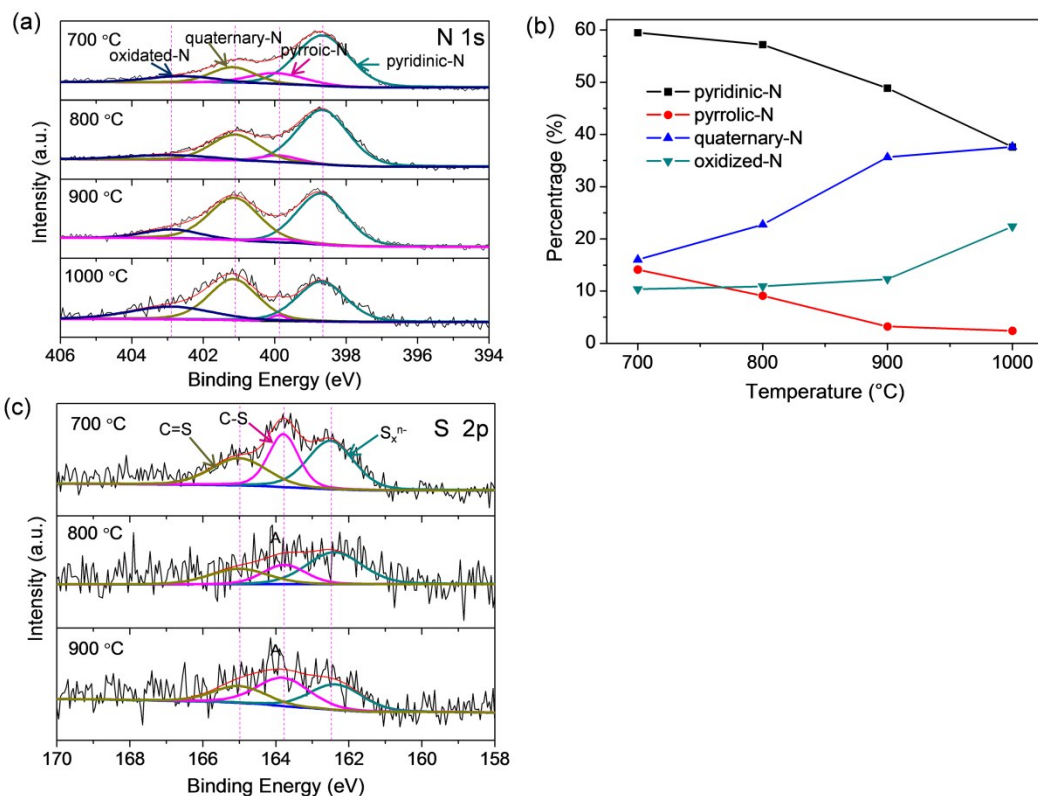

**Fig. S11** a) high-resolution and the corresponding deconvoluted N 1s XPS spectrum of Co@NS/CNTs-MCF-700, Co@NS/CNTs-MCF-800, Co@NS/CNTs-MCF-900, and Co@NS/CNTs-MCF-1000; b) the corresponding contents of pyridinic-N, pyrrolic-N, graphitic-N, and oxidated-N; c) high-resolution and the corresponding deconvoluted S 2p XPS spectra of Co@NS/CNTs-MCF-700, Co@NS/CNTs-MCF-800, and Co@NS/CNTs-MCF-900.

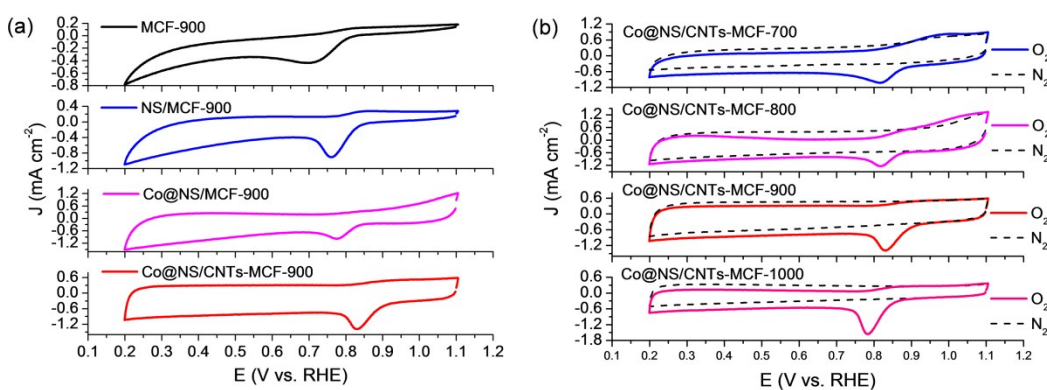

**Fig. S12** a) CV curves of MCF-900, NS/MCF-900, Co@NS/MCF-900, and Co@NS/CNTs-MCF-900 at a scan rate of 50 mV s<sup>-1</sup> in O<sub>2</sub>-saturated 0.1 M KOH; b) CV curves of Co@NS/CNTs-MCF-700, Co@NS/CNTs-MCF-800, Co@NS/CNTs-MCF-900, and Co@NS/CNTs-MCF-1000 at a scan rate of 50 mV s<sup>-1</sup> in N<sub>2</sub> and O<sub>2</sub>-saturated 0.1 M KOH, respectively.

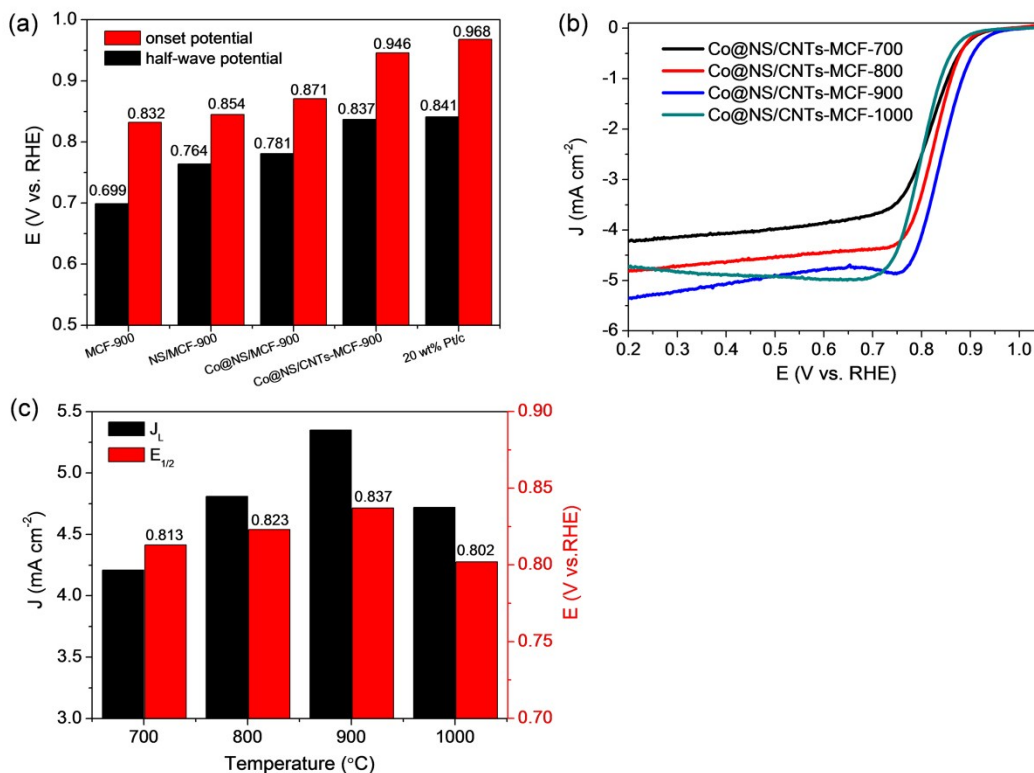

**Fig. S13** a) onset potentials and half-wave potentials of MCF-900, NS/MCF-900, Co@NS/MCF-900, and Co@NS/CNTs-MCF-900, respectively; b) LSV curves of Co@NS/CNTs-MCF-700, Co@NS/CNTs-MCF-800, Co@NS/CNTs-MCF-900, and Co@NS/CNTs-MCF-1000 at 5 mV s<sup>-1</sup> and a rotation speed of 1600 rpm; c) the corresponding diffusion-limited current densities at 0.20 V (vs. RHE) and half-wave potentials.

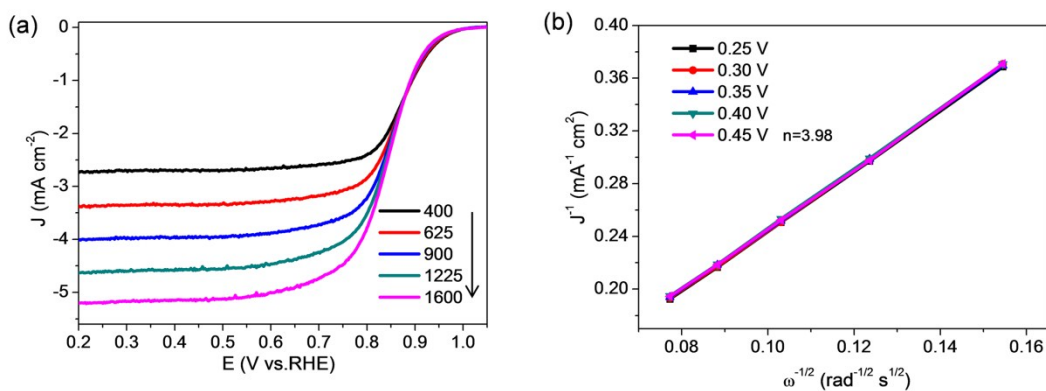

**Fig. S14** a) LSV curves of commercial 20 wt% Pt/C catalyst in O<sub>2</sub>-saturated 0.1 M KOH at various rotation speeds; b) the corresponding K-L plots at different potentials.

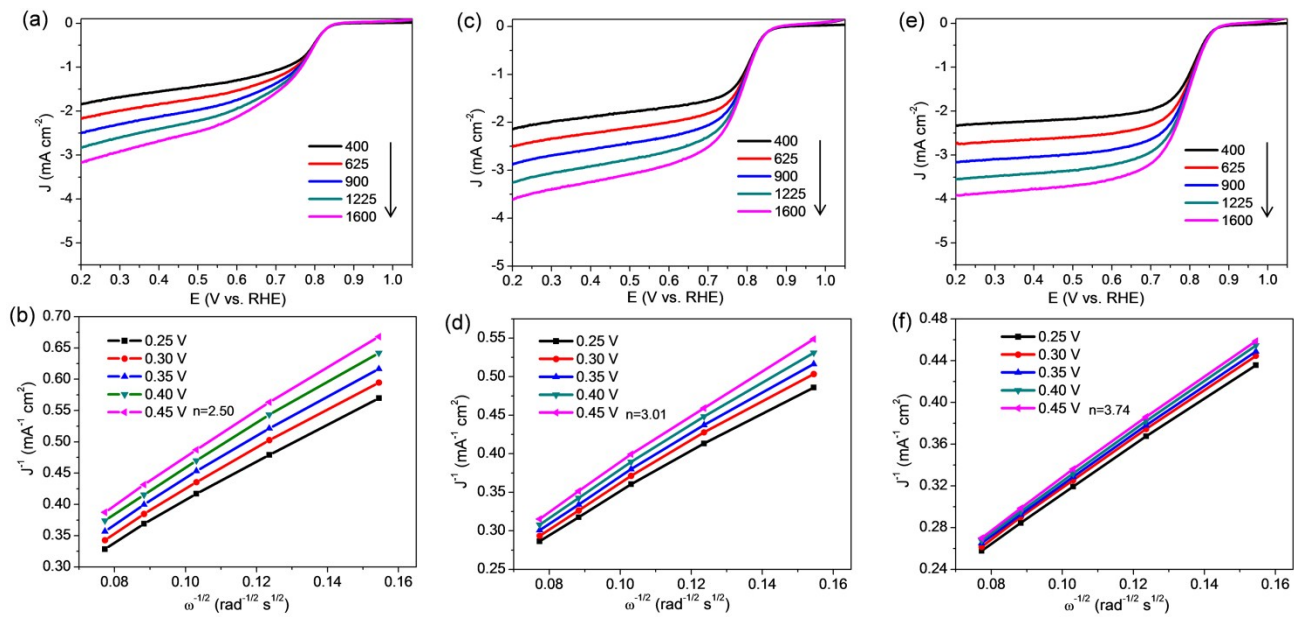

**Fig. S15** a, c, e) LSV curves of MCF-900, NS/MCF-900, and Co@NS/-MCF-900 in O<sub>2</sub>-saturated 0.1 M KOH at various rotation speeds, respectively; b, d, f) the corresponding K-L plots at different potentials.

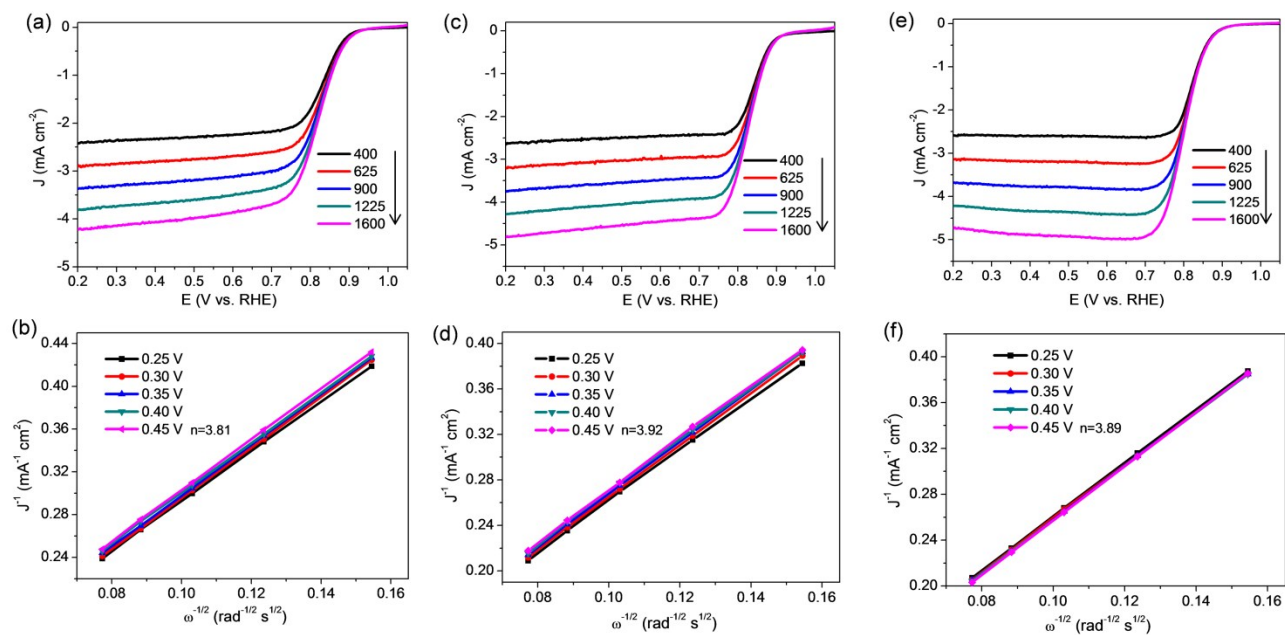

**Fig. S16** a, c, e) LSV curves of Co@NS/CNTs-MCF-700, Co@NS/CNTs-MCF-800 , and Co@NS/CNTs-MCF-1000 in O<sub>2</sub>-saturated 0.1 M KOH at various rotation speeds, respectively; b, d, f) the corresponding K-L plots at different potentials

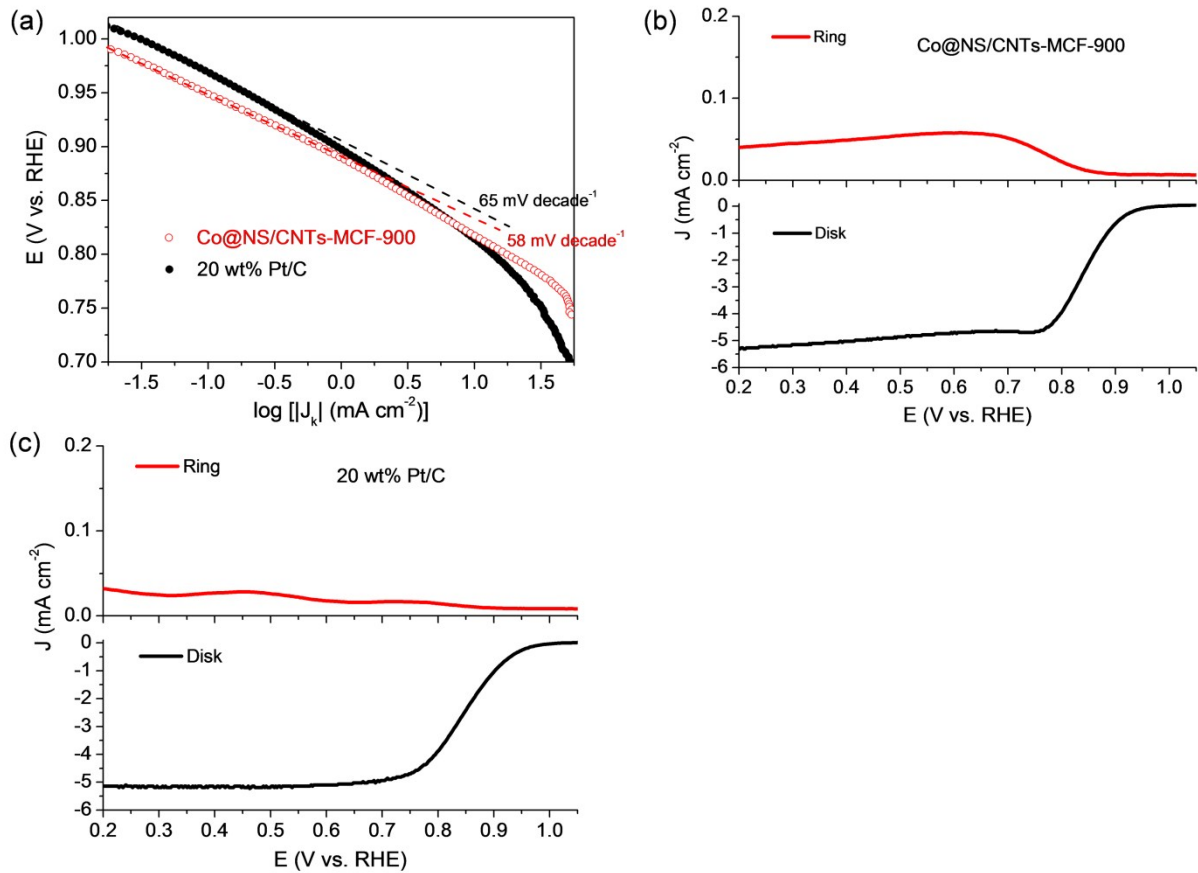

**Fig. S17** a) Tafel plots of Co@NS/CNTs-MCF-900 and commercial 20 wt% Pt/C catalyst; b) RRDE results of Co@NS/CNTs-MCF-900; c) RRDE results of commercial 20 wt% Pt/C catalyst.

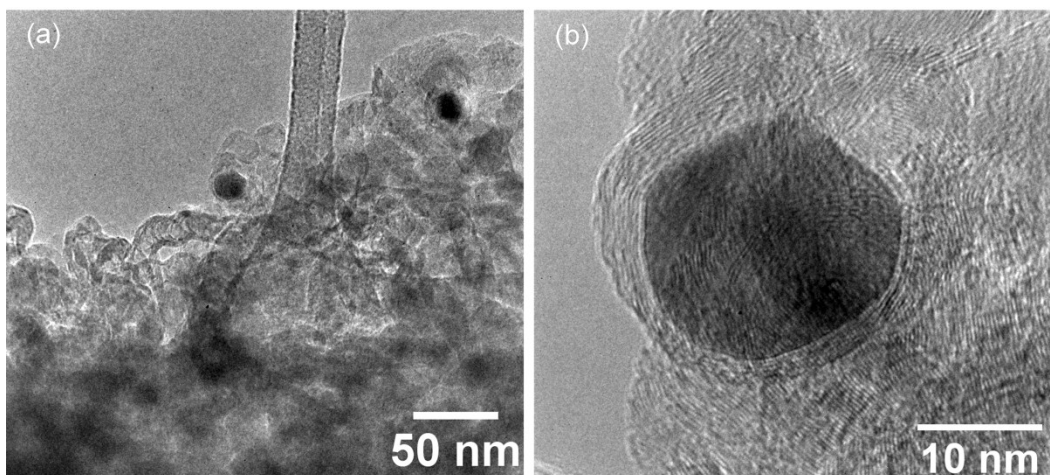

**Figure S18.** (a) TEM and (b) HRTEM of Co NPs coated by several graphitic shells after ORR durability test for about 24 h.

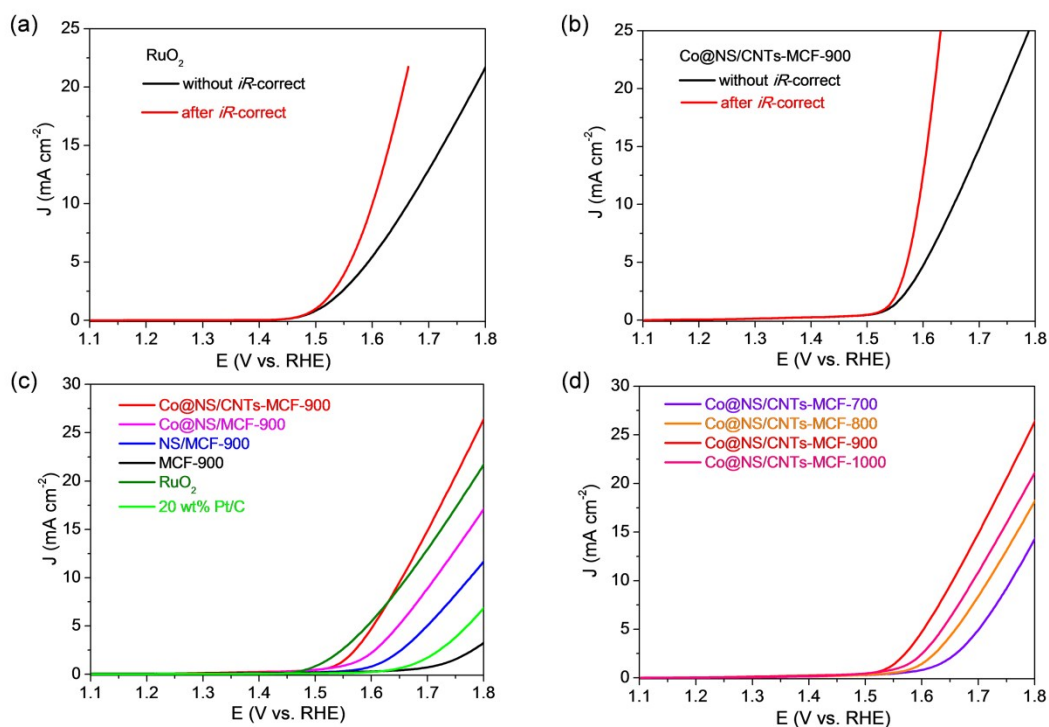

**Fig. S19** a) Polarization curves of commercial  $\text{RuO}_2$  catalyst with (red) and without (black)  $iR$ -correct at a scan rate of  $5 \text{ mV s}^{-1}$  and 1600 rpm in  $\text{O}_2$ -saturated 0.1 M KOH solution; b) polarization curves of  $\text{Co@NS/CNTs-MCF-900}$  with (red) and without (black)  $iR$ -correct; c) polarization curves of MCF-900, NS/MCF-900,  $\text{Co@NS/MCF-900}$ ,  $\text{Co@NS/CNTs-MCF-900}$ , commercial  $\text{RuO}_2$ , and 20 wt% Pt/C catalysts without  $iR$  correct; d) polarization curves of

Co@NS/CNTs-MCF-700, Co@NS/CNTs-MCF-800, Co@NS/CNTs-MCF-1000, without iR correct. The solution resistance was determined by the EIS technique.

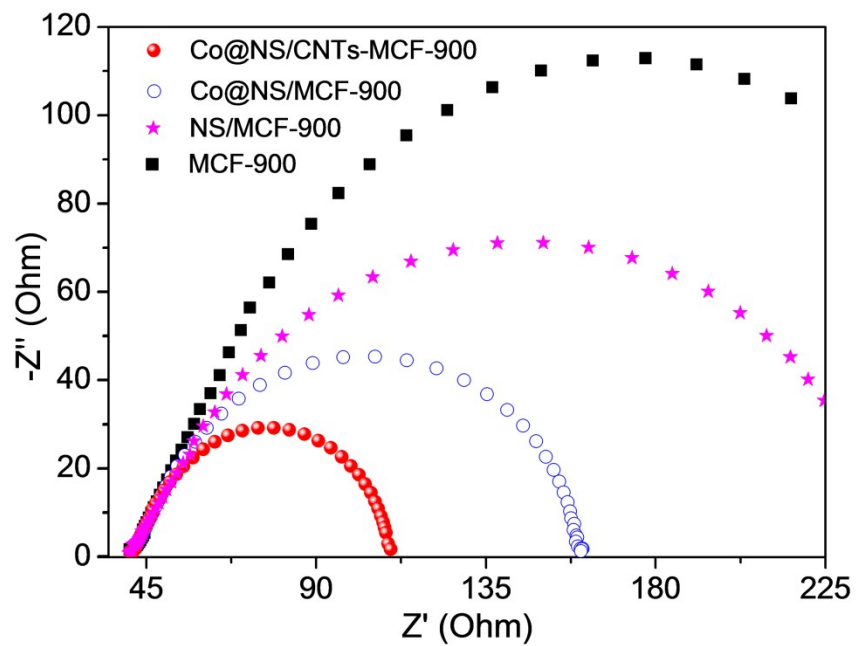

**Fig. S20** The electrochemical impedance spectroscopy (EIS) spectra of MCF-900, NS/MCF-900, Co@NS/MCF-900, and Co@NS/CNTs-MCF-900, measured within the frequency range from 0.01 to 100 kHz at 1.65 V (vs. RHE) and a potentiostatic signal amplitude of 5 mV in 0.1 M KOH.



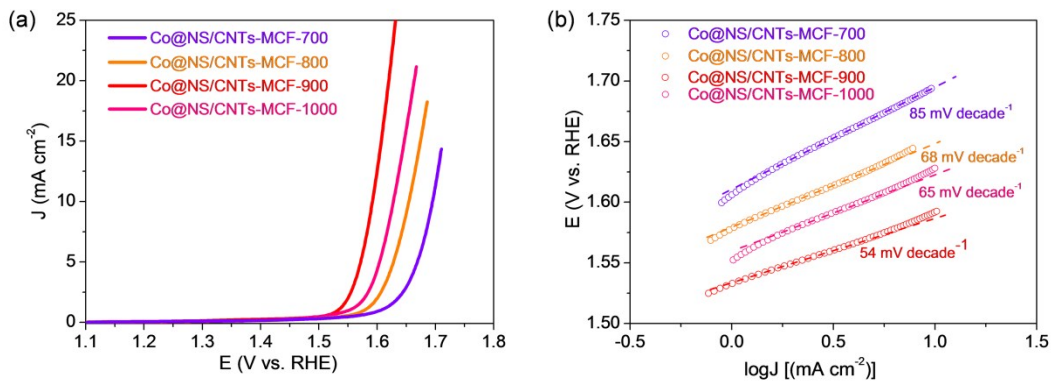

**Fig. S21** a) iR-corrected polarization curves for OER at a scan rate of  $5 \text{ mV s}^{-1}$  and 1600 rpm in  $\text{O}_2$ -saturated 0.1 M KOH solution on Co@NS/CNTs-MCF-700, Co@NS/CNTs-MCF-800, Co@NS/CNTs-MCF-900, and Co@NS/CNTs-MCF-1000; b) the corresponding Tafel plots.

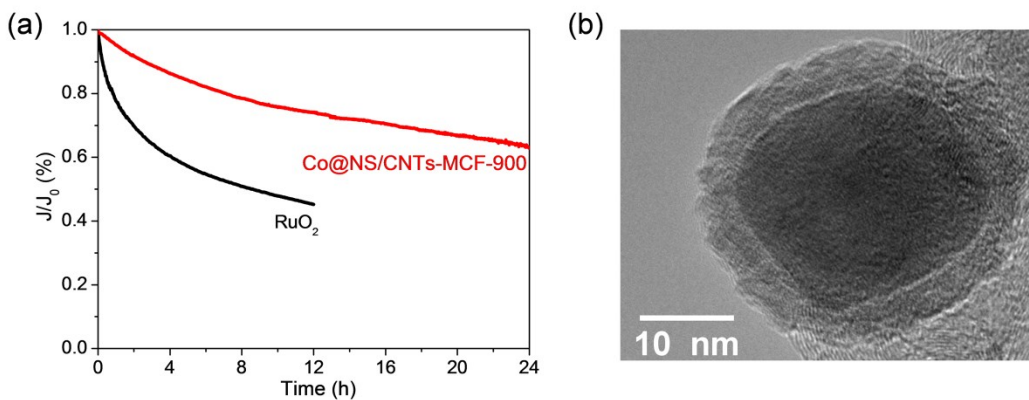

**Fig. S22** (a) Current-time chronoamperometric responses of Co@NS/CNTs-MCF-900 and commercial  $\text{RuO}_2$  catalyst at a constant voltage of 1.60 V (vs. RHE) in  $\text{O}_2$ -saturated 0.1 M KOH; (b) HRTEM of Co NPs coated by several graphitic shells after OER durability test for about 24 h.

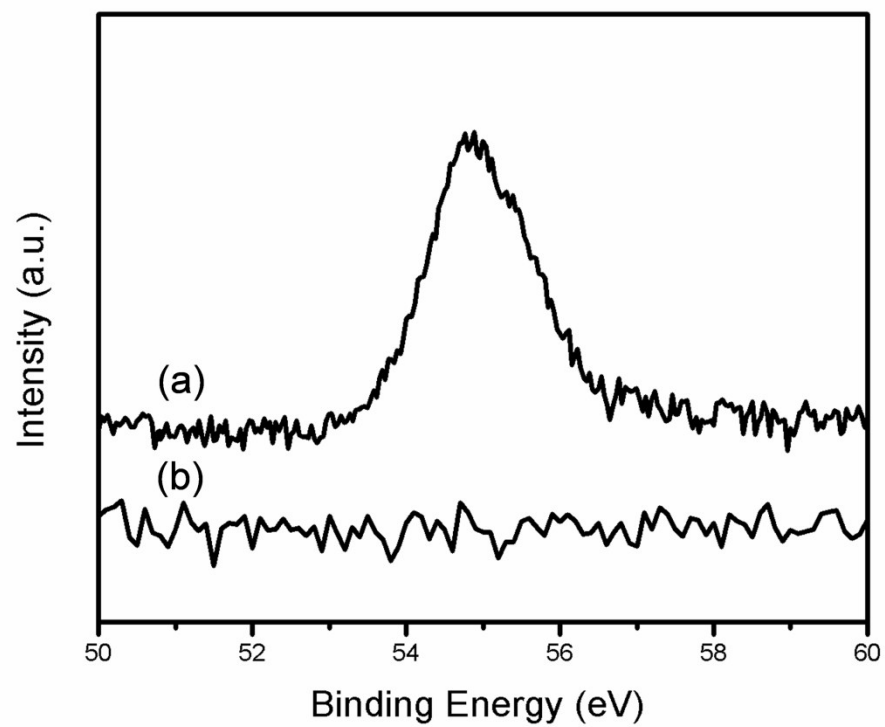

**Fig. S23** Li 1s XPS spectra of the a) discharged and b) charged Co@NS/CNTs-MCF-900 mat cathode.

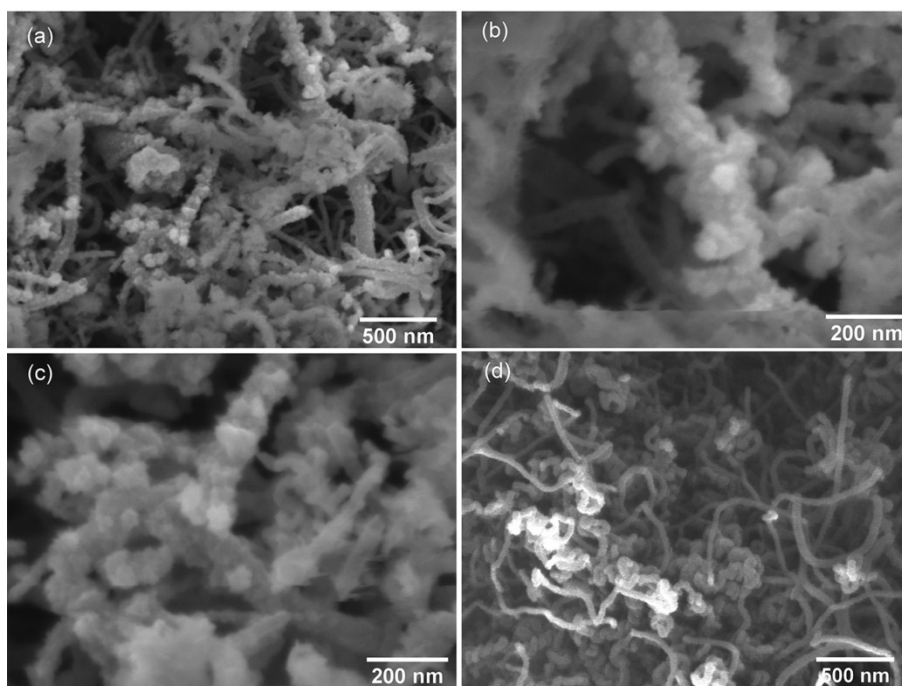

**Fig. S24** a) SEM image of discharged Co@NS/CNTs-MCF-900 mat cathode; b,c) the corresponding high-magnified SEM images; d) SEM image of charged Co@NS/CNTs-MCF-900 mat cathode.

**Table S4** Comparison of the ORR performance of different catalysts.

| Catalyst                                | Catalyst Loading (mg cm <sup>-2</sup> ) | Onset potential (V vs. RHE) | Half-wave potential (V vs. RHE) | n         | Electrolyte | Supplementary Reference |
|-----------------------------------------|-----------------------------------------|-----------------------------|---------------------------------|-----------|-------------|-------------------------|
| Co@NS/CN Ts-MCF-900                     | 0.6                                     | 0.946                       | 0.837                           | 3.97      | 0.1 M KOH   | This work               |
| Co <sub>3</sub> O <sub>4</sub> /N-rmGO  | 0.17                                    | 0.88                        | 0.83                            | 3.9       | 0.1 M KOH   | 1                       |
| Fe-N-CNFs                               | 0.60                                    | 0.93                        | 0.81                            | 3.93      | 0.1 M KOH   | 2                       |
| Co <sub>3</sub> S <sub>8</sub> @CNS 900 | 0.4                                     | 0.927                       | 0.807                           | 3.97      | 0.1 M KOH   | 3                       |
| Co <sub>3</sub> O <sub>4</sub> /NPG C   | 0.2                                     | 0.97                        | 0.842                           | ~4        | 0.1 M KOH   | 4                       |
| N/Co-doped PCP//NRGO                    | 0.714                                   | 0.97                        | 0.86                            | 3.90-3.94 | 0.1 M KOH   | 5                       |
| N-carbon nanotube frameworks            | 0.2                                     | 0.97                        | 0.87                            | 3.97      | 0.1 M KOH   | 6                       |
| Fe-N-CC                                 | 0.1                                     | 0.94                        | 0.83                            | ~3.8      | 0.1 M KOH   | 7                       |
| Fe-N/C-800                              | 0.1                                     | 0.923                       | 0.809                           | 4.15      | 0.1 M KOH   | 8                       |
| P-CNCo-20                               | 0.1                                     | 0.93                        | 0.85                            | 3.9       | 0.1 M KOH   | 9                       |
| Co@Co <sub>3</sub> O <sub>4</sub> @C-CM | 0.1                                     | 0.93                        | 0.81                            | 3.8       | 0.1 M KOH   | 10                      |
| LDG@ZIF-CoZn-800                        | 0.2                                     | 0.976                       | 0.849                           | 3.96      | 0.1 M KOH   | 11                      |
| CoP-CMP800                              | 0.6                                     | 0.88                        | 0.82                            | 3.83-3.86 | 0.1 M KOH   | 12                      |
| Co,N-CNF                                | 0.12                                    | -0.082 (vs Ag/AgCl)         | -0.155 (vs Ag/AgCl)             | N/A       | 0.1 M KOH   | 13                      |
| Pt/C                                    | 0.1                                     | 0.9                         | 0.841                           | 3.98      | 0.1 M KOH   | This work               |

**Table S5** Comparison of the OER performance of different catalysts.

| Catalyst                                          | Catalyst Loading (mg cm <sup>-2</sup> ) | Overpotential $\eta$ (mV) @ 10 mA cm <sup>-2</sup> | Tafel slop (mV dec <sup>-1</sup> ) | Electrolyte | Supplementary Reference |
|---------------------------------------------------|-----------------------------------------|----------------------------------------------------|------------------------------------|-------------|-------------------------|
| Co@NS/CNTs-MCF-900                                | 0.6                                     | 357 mV                                             | 54                                 | 0.1 M KOH   | This work               |
| Co <sub>3</sub> O <sub>4</sub> /N-rmGO            | 1                                       | 310 mV                                             | 67                                 | 1 M KOH     | 1                       |
| N-CG-CoO                                          | 0.71                                    | 340 mV                                             | 71                                 | 1 M KOH     | 14                      |
| CoNP@NC/NG-700                                    | N/A                                     | 390 mV                                             | 78                                 | 0.1 M KOH   | 15                      |
| SC CoO NRs                                        | 0.40                                    | 330 mV                                             | 44                                 | 1 M KOH     | 16                      |
| Co-P film                                         | 1                                       | 345 mV                                             | 47                                 | 1 M KOH     | 17                      |
| CoP NR/C                                          | 0.71                                    | 320 mV                                             | 71                                 | 1 M KOH     | 18                      |
| NiCo LDH                                          | N/A                                     | 367 mV                                             | 40                                 | 1 M KOH     | 19                      |
| Co <sub>x</sub> O <sub>y</sub> /NC                | 0.21                                    | 430 mV                                             | 74.8                               | 0.1 M KOH   | 20                      |
| NG-CoSe <sub>2</sub> composite                    | 0.2                                     | 366 mV                                             | 40                                 | 0.1 M KOH   | 21                      |
| Co/N-C-800                                        | 0.25                                    | 371 mV                                             | 61.4                               | 0.1 M KOH   | 22                      |
| Ni-Co <sub>2</sub> -O                             | 0.2                                     | 362 mV                                             | 64.4                               | 0.1 MKOH    | 23                      |
| Annealed C-Co                                     | 0.2                                     | 390                                                | N/A                                | 0.1 MKOH    | 24                      |
| Co <sub>2</sub> B-500                             | 0.21                                    | 380                                                | 45                                 | 0.1 MKOH    | 25                      |
| Mn <sub>3</sub> O <sub>4</sub> /CoSe <sub>2</sub> | 0.2                                     | 450                                                | 49                                 | 0.1 MKOH    | 26                      |
| N-Co <sub>9</sub> S <sub>8</sub> /G               | 0.2                                     | 409 mV                                             | 82.7                               | 0.1 M KOH   | 27                      |
| RuO <sub>2</sub>                                  | 0.2                                     | 360 mV                                             | 58                                 | 0.1 M KOH   | This work               |

**Table S6** Comparison of the highly active ORR-OER activities of different catalysts.

| Catalyst                                | Catalyst Loading (mg cm <sup>-2</sup> ) | $E_{1/2}$ (V) ORR Half-wave potential | $E_{J=10}$ (V) OER@ 10 mA cm <sup>-2</sup> | Overall oxygen activity $\Delta E = E_{J=10} - E_{1/2}$ | Electrolyte | Supplementary Reference |
|-----------------------------------------|-----------------------------------------|---------------------------------------|--------------------------------------------|---------------------------------------------------------|-------------|-------------------------|
| Co@NS/CN Ts-MCF-900                     | 0.6                                     | 0.837                                 | 1.592                                      | 0.755                                                   | 0.1 M KOH   | This work               |
| Co <sub>3</sub> O <sub>4</sub> /N-rmGO  | 1                                       | 0.86                                  | 1.54                                       | 0.71                                                    | 1 M KOH     | 1                       |
| NCNTFs                                  | 0.2                                     | 0.87                                  | 1.60                                       | 0.73                                                    | 0.1 M KOH   | 6                       |
| N-CG-CoO                                | 0.7                                     | 0.81                                  | 1.57                                       | 0.76                                                    | 1 M KOH     | 14                      |
| SC CoO NRs                              | 0.4                                     | 0.85                                  | 1.56                                       | 0.71                                                    | 1 M KOH     | 16                      |
| Co@Co <sub>3</sub> O <sub>4</sub> /NC-1 | 0.21                                    | 0.80                                  | 1.65                                       | 0.86                                                    | 0.1 M KOH   | 28                      |
| NCT/Co <sub>x</sub> Mn <sub>1-x</sub> O | 0.21                                    | 0.84                                  | 1.57                                       | 0.73                                                    | 1 M KOH     | 29                      |
| Co/N-CNTs                               | 0.20                                    | 0.84                                  | 1.62                                       | 0.78                                                    | 0.1 M KOH   | 30                      |
| N-GRW                                   | 0.6                                     | 0.84                                  | 1.59                                       | 0.75                                                    | 1 M KOH     | 31                      |
| Co <sub>3</sub> O <sub>4</sub> /NBG FSs | 0.13                                    | 0.862                                 | 1.70                                       | 0.838                                                   | 0.1 M KOH   | 32                      |
| CoS <sub>2</sub> (400)/N,S-Go           | 0.25                                    | 0.79                                  | 1.61                                       | 0.82                                                    | 0.1 M KOH   | 33                      |
| Co <sub>3</sub> O <sub>4</sub> C-NA     | 0.2                                     | 0.78                                  | 1.52                                       | 0.74                                                    | 0.1 M KOH   | 34                      |

## Supplementary References

- 1 Y. Y. Liang, Y. G. Li, H. L. Wang, J. G. Zhou, J. Wang, T. Regier, H. J. Dai, *Nat. Mater.* 2011, *10*, 780-786.
- 2 Z. Y. Wu, X. X. Xu, B. C. Hu, H. W. Liang, Y. Lin, L. F. Chen, S. H. Yu, *Angew. Chem., Int. Edit.* 2015, *54*, 8179-8183.
- 3 Q. L. Zhu, W. Xia, T. Akita, R. Q. Zou, Q. Xu, *Adv. Mater.* 2016, *28*, 6391.
- 4 G. Li, X. L. Wang, J. Fu, J. D. Li, M. G. Park, Y. N. Zhang, G. Lui, Z. W. Chen, *Angew. Chem., Int. Edit.* 2016, *55*, 4977-4982.
- 5 Y. Hou, Z. H. Wen, S. M. Cui, S. Q. Ci, S. Mao, J. H. Chen, *Adv. Funct. Mater.* 2015, *25*, 872-882.
- 6 B. Y. Xia, Y. Yan, N. Li, H. B. Wu, X. W. D. Lou, X. Wang, *Nat. Energy*, 2016, *1*, 15006.
- 7 G. A. Ferrero, K. Preuss, A. Marinovic, A. B. Jorge, N. Mansor, D. J. L. Brett, A. B. Fuertes, M. Sevilla, M. M. Titirici, *Acs Nano* 2016, *10*, 5922-5932.
- 8 L. Lin, Q. Zhu, A. W. Xu, *J. Am. Chem. Soc.* 2014, *136*, 11027-11033.
- 9 Y. Z. Chen, C. M. Wang, Z. Y. Wu, Y. J. Xiong, Q. Xu, S. H. Yu, H. L. Jiang, *Adv. Mater.* 2015, *27*, 5010-5016.
- 10 W. Xia, R. Zou, L. An, D. Xia, S. Guo, *Energy Environ. Sci.* 2015, *8*, 568-576.
- 11 Z. H. Li, M. F. Shao, L. Zhou, Q. H. Yang, C. Zhang, M. Wei, D. G. Evans, X. Duan, *Nano Energy*, 2016, *25*, 100-109.
- 12 Z. S. Wu, L. Chen, J. Z. Liu, K. Parvez, H. W. Liang, J. Shu, H. Sachdev, R. Graf, X. L. Feng, K. Mullen, *Adv. Mater.* 2014, *26*, 1450-1455.
- 13 L. Shang, H. J. Yu, X. Huang, T. Bian, R. Shi, Y. F. Zhao, G. I. N. Waterhouse, L. Z. Wu, C. H. Tung, T. R. Zhang, *Adv. Mater.* 2016, *28*, 1668-1674.
- 14 S. Mao, Z. H. Wen, T. Z. Huang, Y. Hou, J. H. Chen, *Energy Environ. Sci.* 2014, *7*, 609-616.
- 15 X. Zhong, Y. Jiang, X. Chen, L. Wang, G. L. Zhuang, X. Li, J. G. Wang, *J. Mater. Chem. A*, DOI: 10.1039/C6TA03820D.
- 16 T. Ling, D. Y. Yan, Y. Jiao, H. Wang, Y. Zheng, X. L. Zheng, J. Mao, X. W. Du, Z. P. Hu, M. Jaroniec, S. Z. Qiao, *Nat. Commun.*, DOI:<http://dx.doi.org.libproxy1.nus.edu.sg/10.1038/ncomms12876>
- 17 N. Jiang, B. You, M. L. Sheng, Y. J. Sun, *Angew. Chem., Int. Edit.* 2015, *54*, 6251-6254.
- 18 J. F. Chang, Y. Xiao, M. L. Xiao, J. J. Ge, C. P. Liu, W. Xing, *ACS Catal.* 2015, *5*, 6874-6878.

- 19 H. F. Liang, F. Meng, M. Caban-Acevedo, L. S. Li, A. Forticaux, L. C. Xiu, Z. C. Wang, S. Jin, *Nano Lett.* 2015, 15, 1421-1427.
- 20 J. Masa, W. Xia, I. Sinev, A. Q. Zhao, Z. Y. Sun, S. Grutzke, P. Weide, M. Muhler, W. Schuhmann, *Angew. Chem., Int. Edit.* 2014, 53, 8508-8512.
- 21 M. R. Gao, X. Cao, Q. Gao, Y. F. Xu, Y. R. Zheng, J. Jiang, S. H. Yu, *Acs Nano* 2014, 8, 3970-3978.
- 22 Y. H. Su, Y. H. Zhu, H. L. Jiang, J. H. Shen, X. L. Yang, W. J. Zou, J. D. Chen, C. Z. Li, *Nanoscale*, 2014, 6, 15080-15089.
- 23 C. Z. Zhu, D. Wen, S. Leubner, M. Oschatz, W. Liu, M. Holzschuh, F. Simon, S. Kaskel, A. Eychmuller, *Chem. Commun.* 2015, 51, 7851-7854.
- 24 L. H. Wu, Q. Li, C. H. Wu, H. Y. Zhu, A. Mendoza-Garcia, B. Shen, J. H. Guo, S. H. Sun, *J. Am. Chem. Soc.* 2015, 137, 7071-7074.
- 25 J. Masa, P. Weide, D. Peeters, I. Sinev, W. Xia, Z. Y. Sun, C. Somsen, M. Muhler, W. Schuhmann, *Adv. Energy Mater.*, DOI: 10.1002/aenm.201502313.
- 26 M. R. Gao, Y. F. Xu, J. Jiang, Y. R. Zheng, S. H. Yu, *J. Am. Chem. Soc.* 2012, 134, 2930-2933.
- 27 S. Dou, L. Tao, J. Huo, S. Y. Wang, L. M. Dai, *Energy Environ. Sci.* 2016, 9, 1320-1326.
- 28 A. Aijaz, J. Masa, C. Rosler, W. Xia, P. Weide, A. J. R. Botz, R. A. Fischer, W. Schuhmann, M. Muhler, *Angew. Chem., Int. Edit.* 2016, 55, 4087-4091.
- 29 X. Liu, M. Park, M. G. Kim, S. Gupta, X. J. Wang, G. Wu, J. Cho, *Nano Energy*, 2016, 20, 315-325.
- 30 Y. Liu, H. Jiang, Y. Zhu, X. Yang, C. Li, *J. Mater. Chem. A* 2016, 4, 1694-1701.
- 31 H. B. Yang, J. W. Miao, S. F. Hung, J. Z. Chen, H. B. Tao, X. Z. Wang, L. P. Zhang, R. Chen, J. J. Gao, H. M. Chen, L. M. Dai, B. Liu, *Sci. Adv.*, DOI: <http://dx.doi.org/10.1126/sciadv.1501122>.
- 32 Z. Q. Jiang, Z. J. Jiang, T. Maiyalagan, A. Manthiram, *J. Mater. Chem. A* 2016, 4, 5877-5889.
- 33 P. Ganesan, M. Prabu, J. Sanetuntikul, S. Shanmugam, *Acs Catal.* 2015, 5, 3625-3637.
- 34 T. Y. Ma, S. Dai, M. Jaroniec, S. Z. Qiao, *J. Am. Chem. Soc.*, 2014, 136, 13925-13931.
